# Supplementary material for: Design and application of potentiometric sensors for the determination of mefenamic and phenylanthranilic acids
Source: Royal Society of Chemistry journal article supplement (doi:10.1039/d2ay02092k), 2023-01-01
Supplement: d2ay02092k1.pdf [file d2ay02092k1.pdf]

Supplementary Information

**Table SI-1** Methods for the determination of mefenamic acid

| Method / reagents / conditions                                                                                                                  | Object                              | Linearity                   | Detection limit       | Ref |
|-------------------------------------------------------------------------------------------------------------------------------------------------|-------------------------------------|-----------------------------|-----------------------|-----|
| <b>Spectrophotometric methods</b>                                                                                                               |                                     |                             |                       |     |
| Copper(II) ammine sulphate; extragent – chloroform; pH 9; $\lambda=430$ nm                                                                      | Pure form and pharmaceuticals       | 6-48 $\mu\text{g/ml}$       | –                     | 18  |
| $\text{FeCl}_3$ in metanol solution; pH 2.7; $\lambda=495$ nm                                                                                   | Pharmaceuticals                     | 96- 579 $\mu\text{g/ml}$    |                       | 19  |
| Ce(III) reaction with arsenazo (III) reagent; pH 3; $\lambda=654$ nm                                                                            | Pharmaceuticals                     | 1 to 10 $\mu\text{g/25 ml}$ |                       | 20  |
| <i>p</i> -chloranilic acid in acetone soln; pH 8.2; $\lambda=520$ nm;                                                                           | Pure form and pharmaceuticals       | 10-300 $\mu\text{g/ml}$     | 2.50 $\mu\text{g/ml}$ | 21  |
| N-bromosuccinamide in methanol soln; $\lambda=362$ nm;                                                                                          |                                     | 5-70 $\mu\text{g/ml}$       | 0.51 $\mu\text{g/ml}$ |     |
| 3-methylbenzo-thiazolin-2-one hydrazone in methanol soln in the presence of $\text{FeCl}_3$ ; $\lambda=602$ nm                                  |                                     | 1-6 $\mu\text{g/ml}$        | 0.06 $\mu\text{g/ml}$ |     |
| Mef in hydrochloric acid in methanol; $\lambda=279, 351$ nm                                                                                     | Pharmaceuticals                     | –                           | –                     | 22  |
| Copper (II) complex with 5,7,7,12,14,14-hexamethyl -1,4,8,11-tetraazacyclo tetradeca-4,11-diene; extragent – chloroform; pH 9; $\lambda=545$ nm | Pharmaceuticals                     | –                           | 0.1 mg/ml             | 23  |
| Methylene violet; extragent – chloroform; pH 7.6; $\lambda=540$ nm                                                                              | Pharmaceuticals                     | 1-8 $\mu\text{g/ml}$        | –                     | 24  |
| First derivative of the ratio spectra solution Mef in NaOH / methanol (1:9)                                                                     | Synthetic mixtures, pharmaceuticals | 2-10 $\mu\text{g/ml}$       | 1.15 $\mu\text{g/ml}$ | 25  |
| <i>p</i> -dimethyl-aminocinnamaldehyde in acidified absolute methanol medium; $\lambda= 665$ nm                                                 | pharmaceutical formulations         | 1-8 $\mu\text{g/ml}$        |                       | 26  |
| Astrafloxin FF / pH 9–11/ extragent : isooctane-dichloroethane 64 : 36 (v/v) / $\lambda=533$                                                    | pharmaceutical formulations         | 2.0-21.0 $\mu\text{g/mL}$   | 0.72 $\mu\text{g/mL}$ | 27  |
| <b>Chromatographic methods</b>                                                                                                                  |                                     |                             |                       |     |
| LC; UV detection; $\lambda = 278$ nm; mobile phase: methanol-glacial acetic acid-water (85:2:15)                                                | Pharmaceuticals                     | 25 – 150 $\mu\text{g/ml}$   |                       | 28  |
| HPLC; UV detection; $\lambda=254$ nm; pH 5.0; mobile phase: acetonitrile-ammonium buffer-                                                       | Pharmaceuticals                     |                             |                       | 29  |

| tetrahydrofuran (23:20:7)                                                                                                                                                                                     |                     |                                                      |                                           |    |
|---------------------------------------------------------------------------------------------------------------------------------------------------------------------------------------------------------------|---------------------|------------------------------------------------------|-------------------------------------------|----|
| GLC; flame ionisation detector, $t_{\text{detect.}} = 290\text{ }^{\circ}\text{C}$ ;<br>mobile phase: N,N-dimethylacetamid-<br>tetramethyl ammonium hydroxide-1-<br>iodobutane (80:10:20)                     | Human serum         | 2 – 50 $\mu\text{g}$ in 2<br>ml serum                | 1 mg/l using 2<br>ml serum                | 47 |
| HPLC; UV detection; $\lambda=280\text{ nm}$ , pH 2.6; mobile<br>phase: phosphoric acid-acetonitrile (40:60)                                                                                                   | Plasma              | 0.1 – 10<br>$\mu\text{g/ml}$                         | 0.08 $\mu\text{g/ml}$ for<br>50 ml plasma | 48 |
| HPLC; UV detection; $\lambda=280\text{ nm}$ ; pH 3; mobile<br>phase: acetonitrile-water (50:50)                                                                                                               | Human serum         | 25– 2000<br>ng/ml                                    | 15ng/ml                                   | 49 |
| HPLC; UV detection; $\lambda=254\text{ nm}$ ; mobile phase:<br>acetonitrile- phosphate buffer (pH 3.5),<br>methanol and tetrahydrofuran.                                                                      | Human<br>plasma     | 11.5–75<br>ng/ml                                     | -                                         | 50 |
| LC-MS/MS; $\lambda = 210\text{ nm}$ ; mobile phase:<br>potassium phosphate buffer (pH 4.0)-<br>acetonitrile (30:70)                                                                                           | River water         | 0.3–12 ng/l                                          | 0.15ng/l                                  | 52 |
| <b>Electrochemical methods</b>                                                                                                                                                                                |                     |                                                      |                                           |    |
| Solid-contact voltamperometric graphite-paste<br>sensor based on $\text{La}(\text{OH})_3$ ; pH 5.8                                                                                                            | Pharmaceutica<br>ls | $2 \times 10^{-11} -$<br>$4 \times 10^{-9}\text{ M}$ | $6.1 \times 10^{-12}\text{ M}$            | 30 |
| Solid-contact voltamperometric graphite-paste<br>sensor based on metal complex with a Schiff<br>base Fe (III)-4-bromo-2-[[2-(2-pyridin-2-yl-<br>ethylsulfanyl)-ethylimino]methyl]phenol<br>(putBrsal); pH 3.5 | Pharmaceutica<br>ls | 0.02 – 150<br>$\mu\text{M/l}$                        | 0.02 $\mu\text{M/l}$                      | 31 |
